# Supplementary material
Source: PubMed Central journal article supplement (PMC7499535)
Supplement: ciaa1313_suppl_Supplemental_Material.pdf [file ciaa1313_suppl_Supplemental_Material.pdf]

# Supplemental Material

**A**

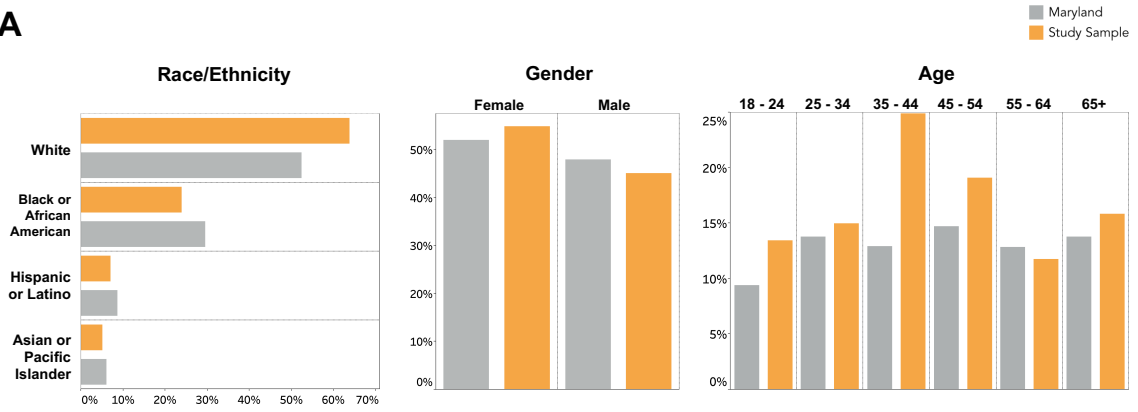

**B**

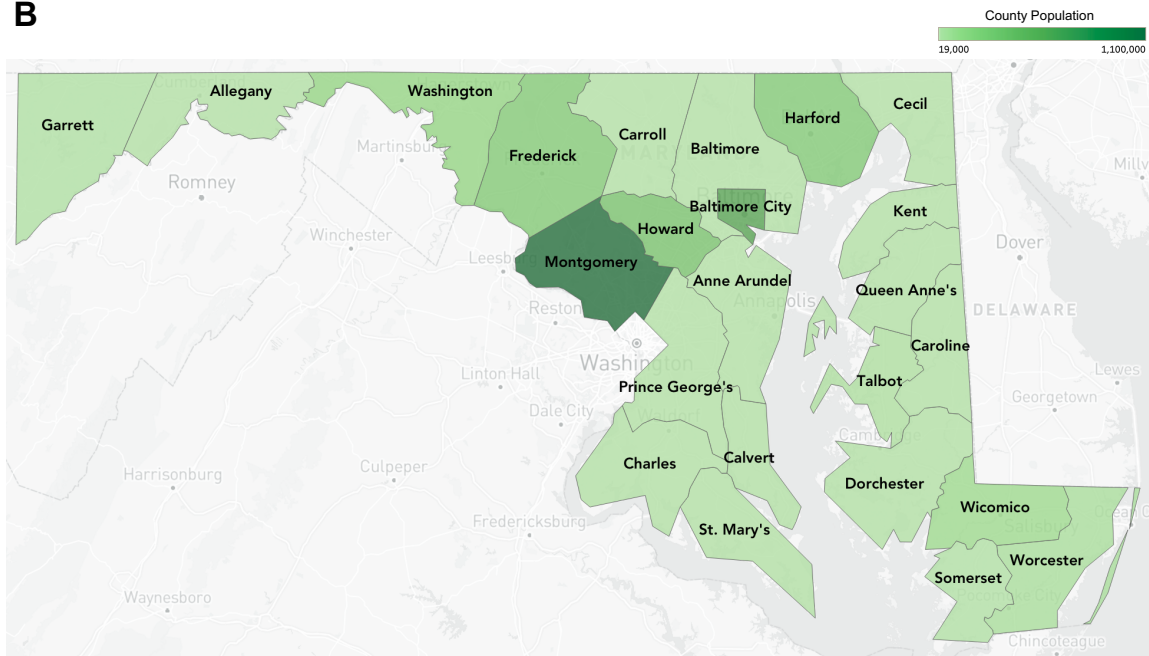

**C**

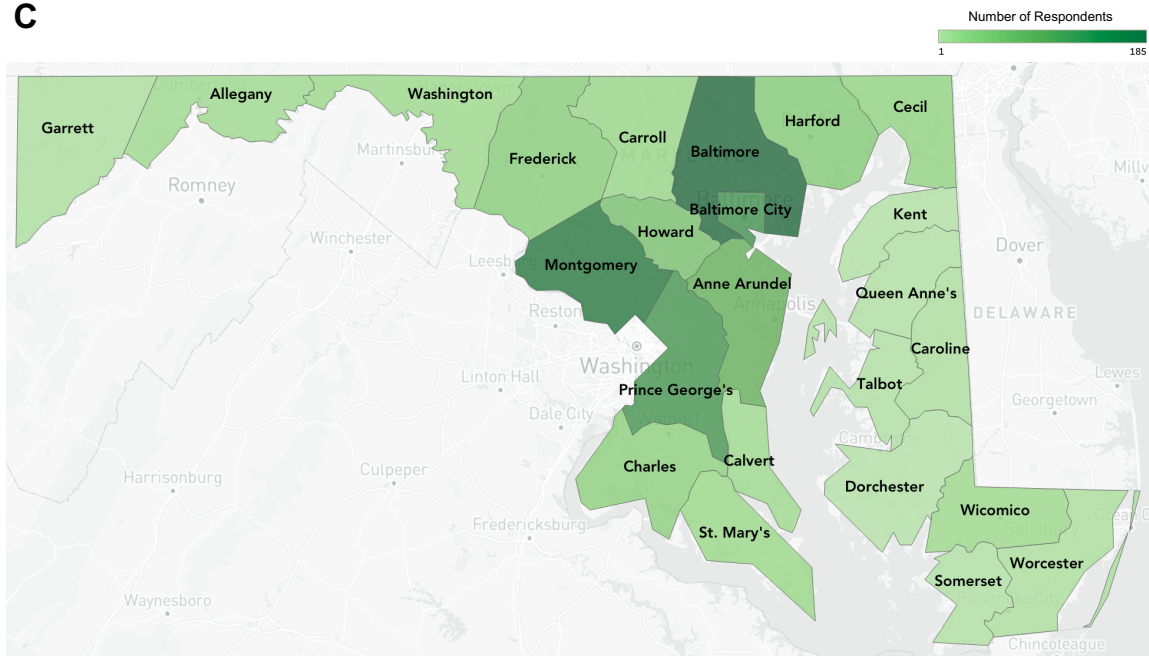

**Supplemental Fig S1.** (A) Distribution of select population demographics in Maryland and the study sample, and (B) Maryland population by county compared to (C) number of survey responses by county.

Source: United States Census Bureau. B01001 SEX BY AGE, 2018 American Community Survey 5-Year Estimates. U.S. Census Bureau, American Community Survey Office. Web. 19 December 2019. <http://www.census.gov/>. United States Census Bureau. Annual Estimates of the Resident Population: April 1, 2010 to July 1, 2019. U.S. Census Bureau, Population Division. Web. July 2020. <http://www.census.gov/>.

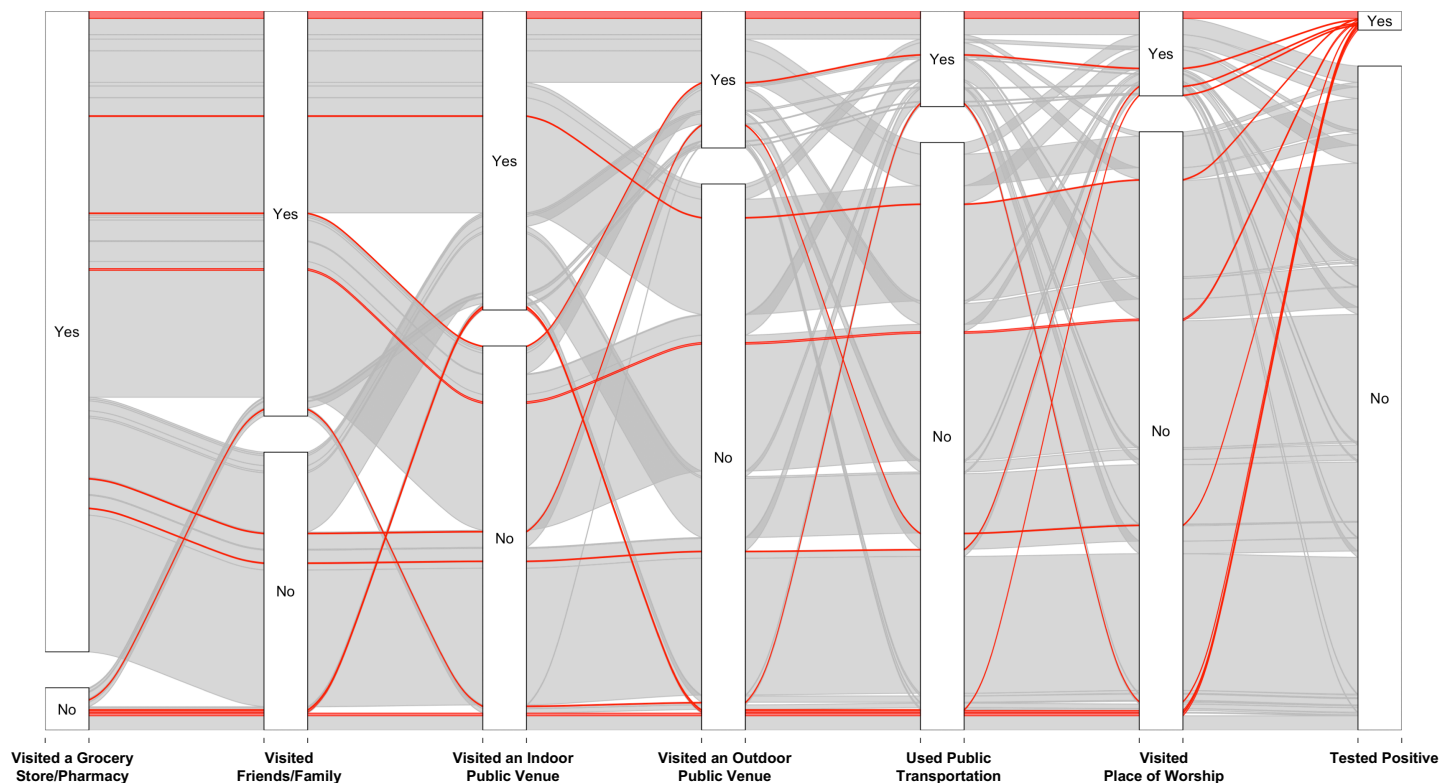

**Supplemental Fig S2.** Sankey diagram showing participant responses across all questions capturing mobility in the past 2 weeks. Participant responses are depicted in each rectangular node with flows representing how many individuals have responded across the entire set of questions, for example, individuals who responded “yes” to both traveling to a grocery store/pharmacy and visiting friends/family are reflected in the flow connecting the two “yes” nodes for these variables. Individuals who have ever tested positive for SARS-CoV-2 are shown in red, whereas all others are shown in grey. A total of 51 (5%) participants responded “yes” to all mobility questions and 39 (4%) responded “no” to all; 17 (31%) of those who tested positive for SARS-CoV-2 responded “yes” to all and 2 (4%) responded “no” to all. The thickness of the flow is directly proportional to the number of respondents who report that behavior.

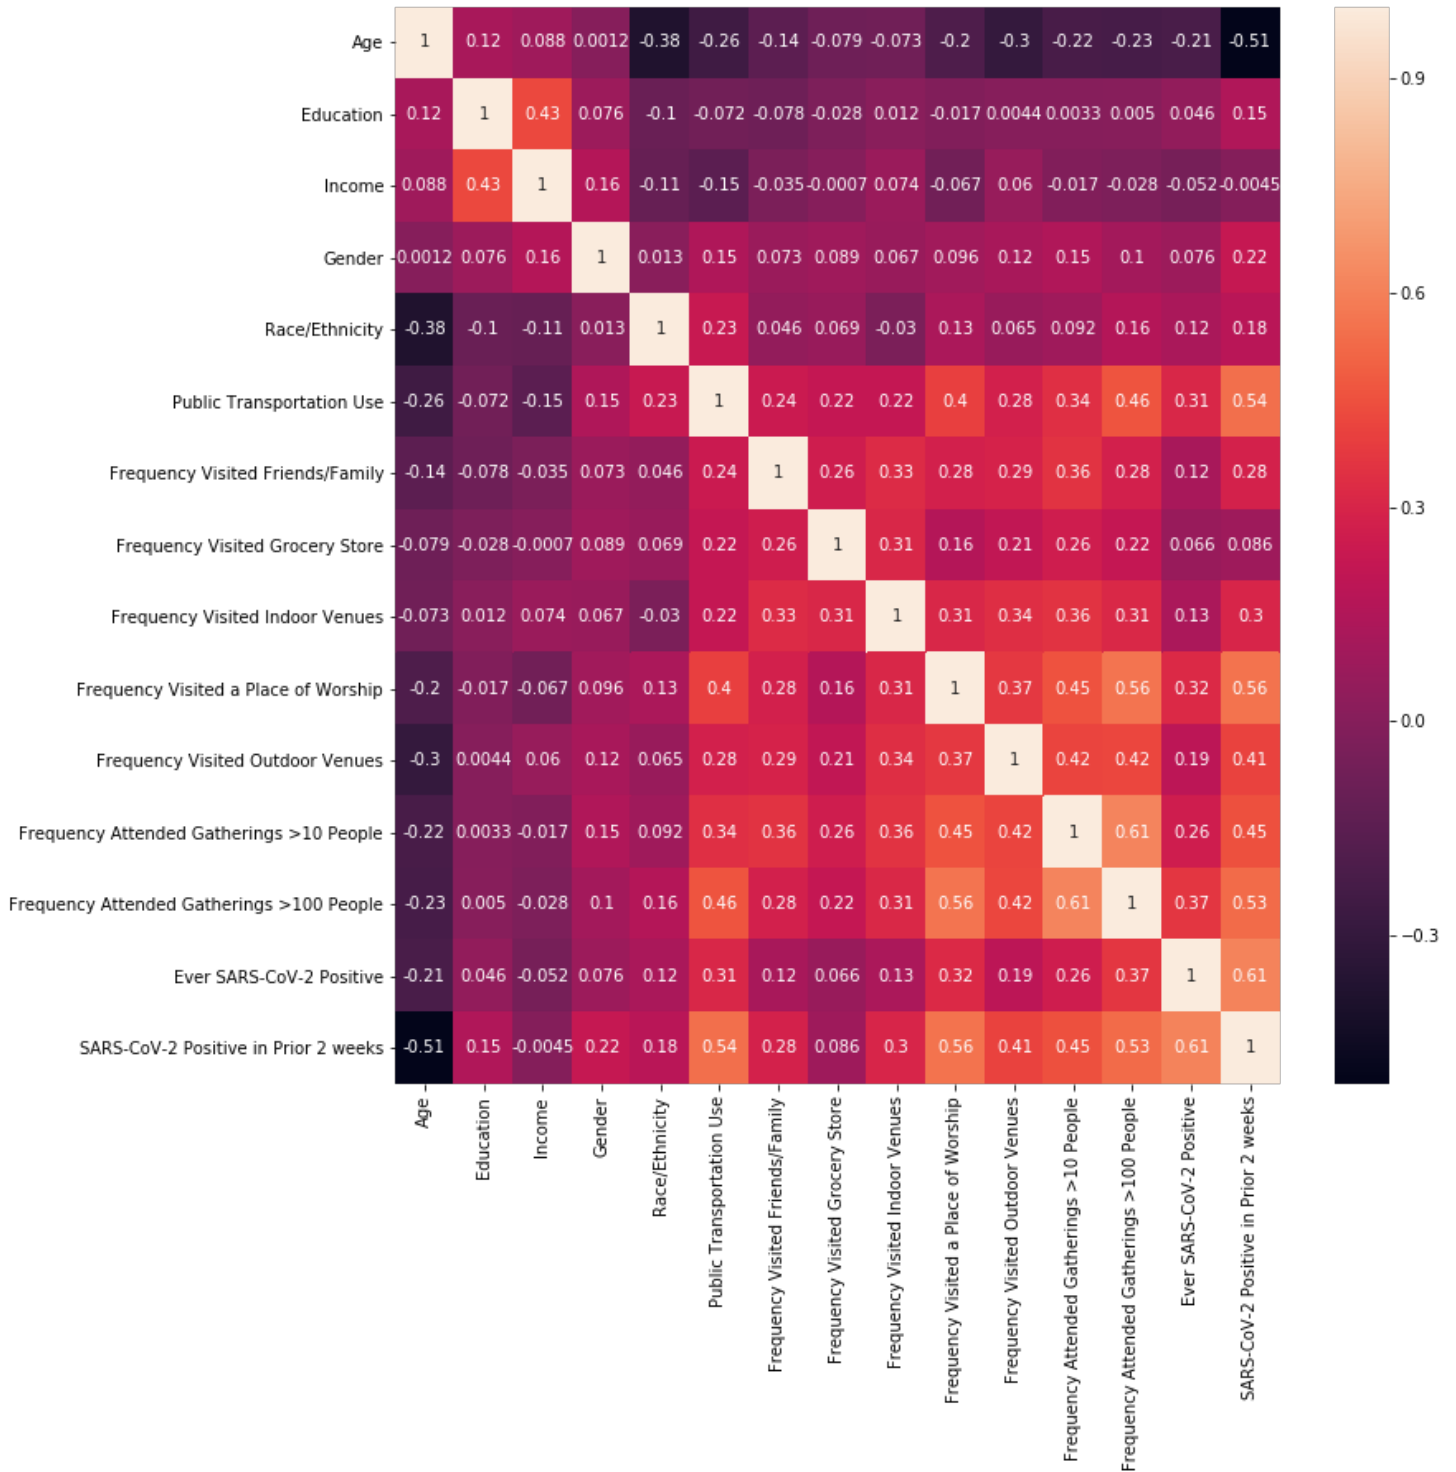

**Supplemental Fig S3.** Heatmap depicting pairwise Spearman correlation coefficients between survey responses. All mobility questions were asked with respect to the prior 2 weeks.

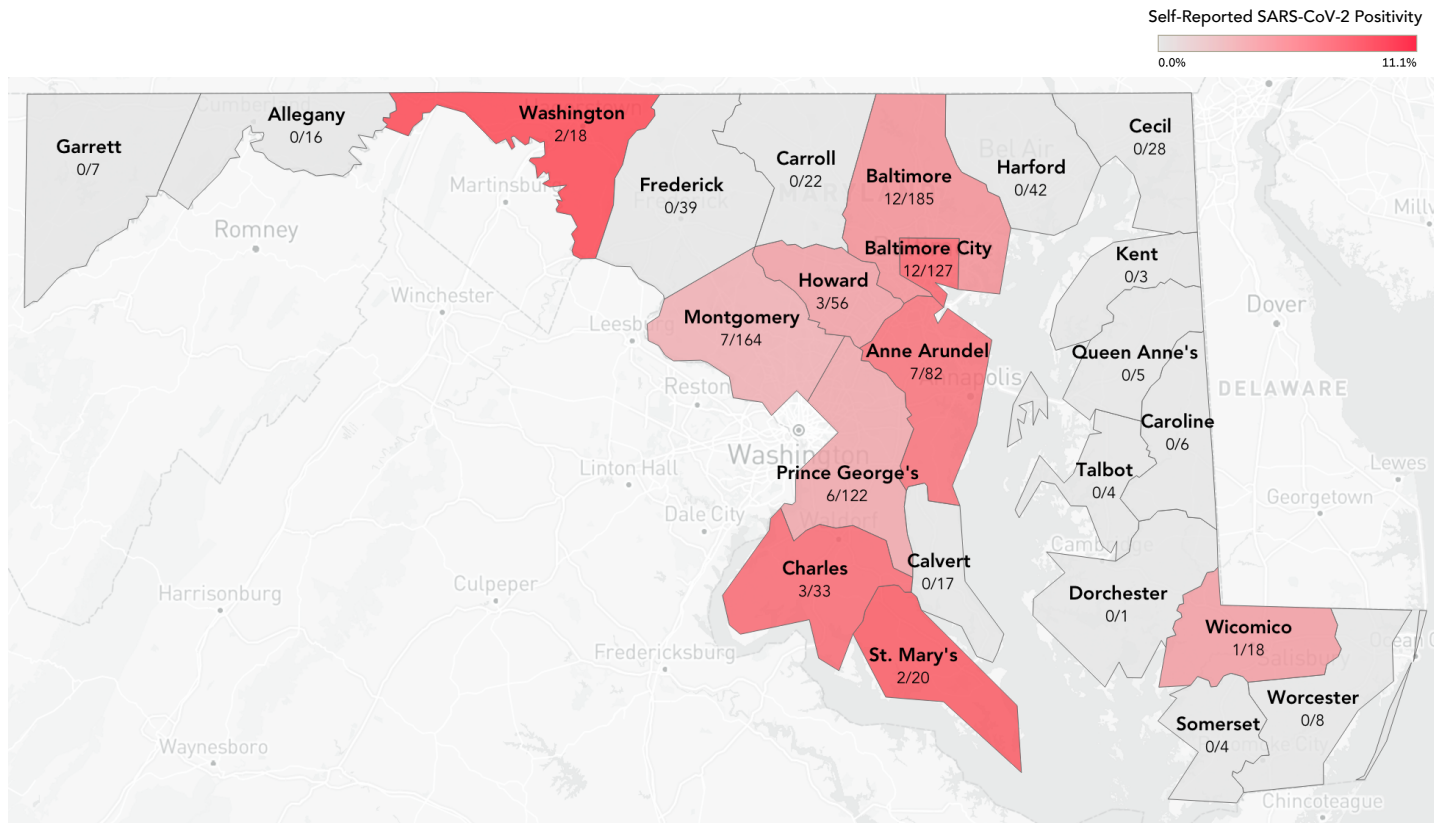

**Supplemental Fig S4.** Self-reported SARS-CoV-2 positivity by Maryland county. Numbers below county labels represent the number of positives over the total number of respondents from that county.

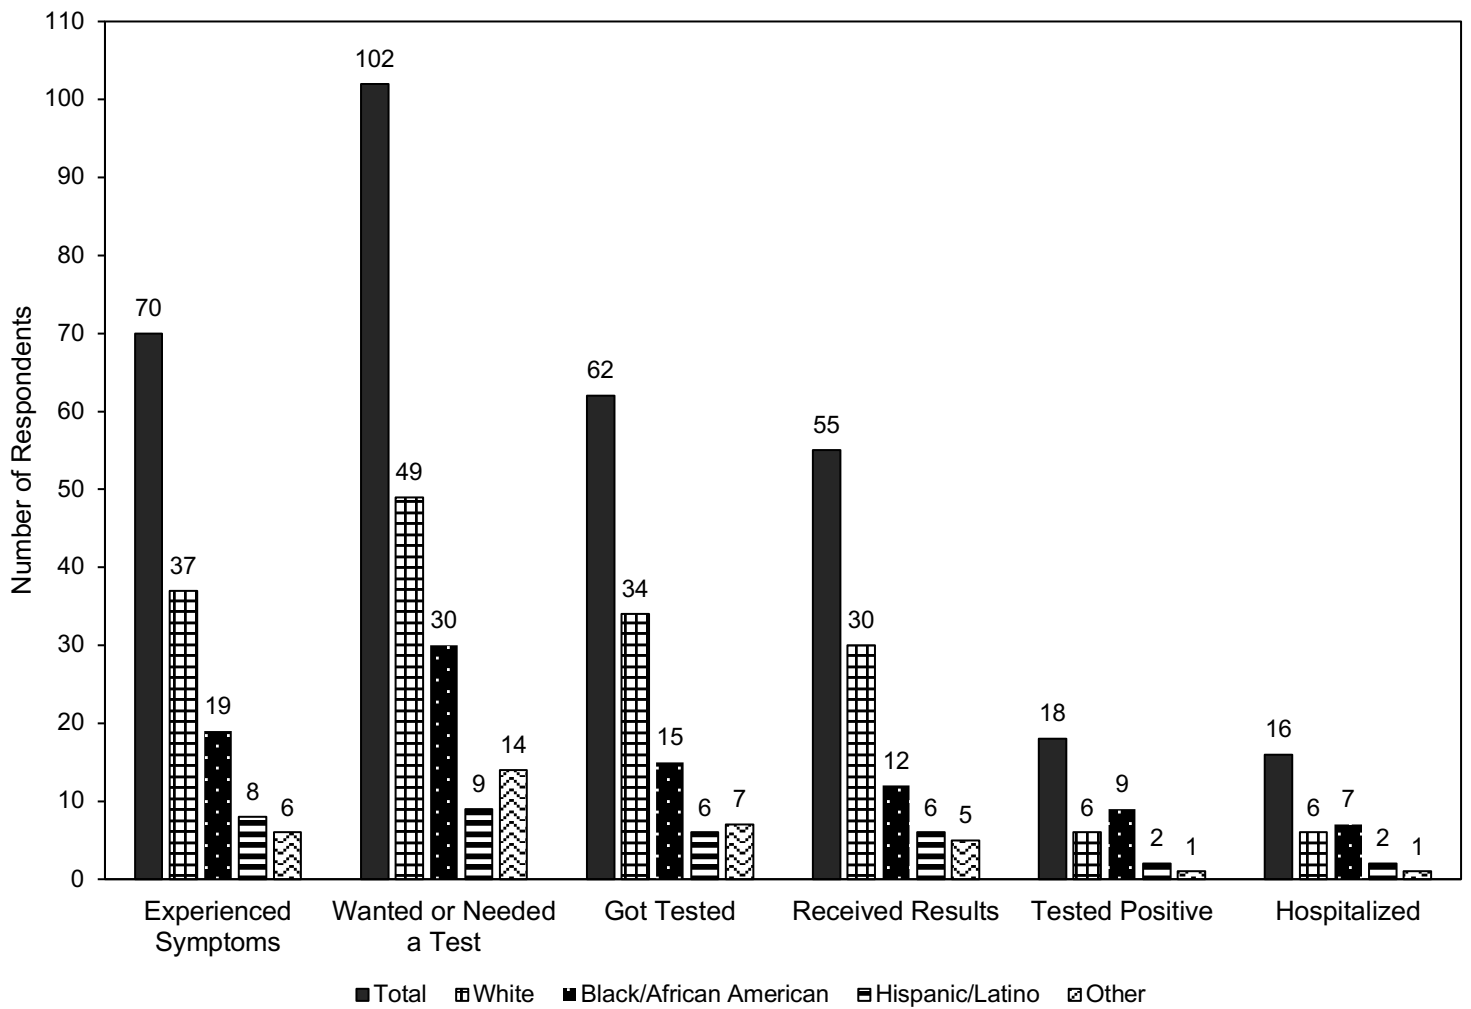

**Supplemental Fig S5.** SARS-CoV-2 testing cascade by race/ethnicity. All numbers reflect behaviors/results in the past 2 weeks.

■ Never    
 ■ Once or twice    
 ■ 3-7 times    
 ■ More than 7 times

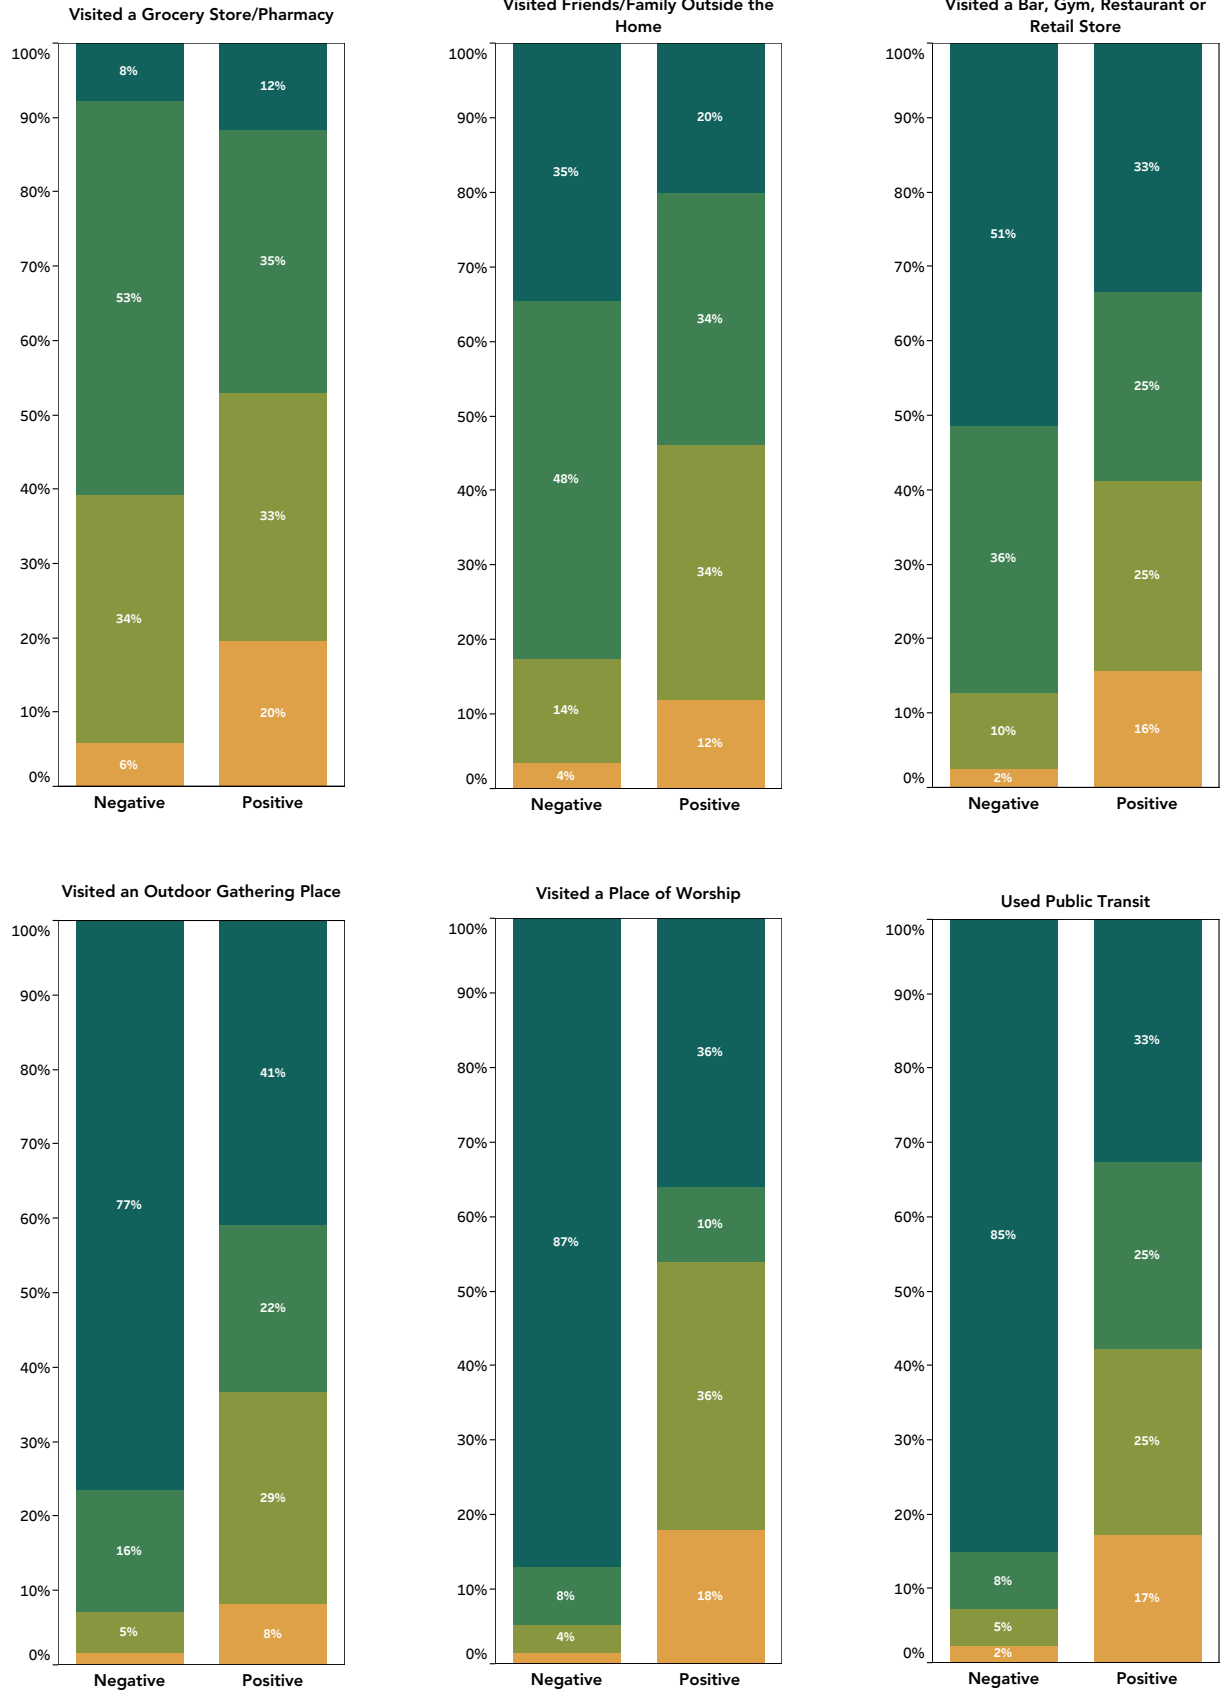

**Supplemental Fig S6.** Participant mobility patterns in the prior 2 weeks by SARS-CoV-2 infection status.

**Supplemental Table S7.** Factors associated with testing positive for SARS-CoV-2 in prior two weeks by univariable logistic regression.

| <b>Factors Associated with Testing Positive for SARS-CoV-2</b> | <b>Tested Positive in Prior 2 weeks<br/>OR (95% CI)</b> |
|----------------------------------------------------------------|---------------------------------------------------------|
| <b>Race/Ethnicity</b>                                          |                                                         |
| White (ref.)                                                   | -                                                       |
| Black/African American                                         | 8.04 (1.89 – 34.1)                                      |
| Hispanic/Latino                                                | 1.43 (0.23 – 9.01)                                      |
| <b>Age</b><br>(per 5-year increase)                            | 0.58 (0.43 – 0.80)                                      |
| <b>Male Gender</b>                                             | 2.80 (0.85 – 9.25)                                      |
| <b>Annual Household Income</b>                                 |                                                         |
| < \$20,000 (ref.)                                              | -                                                       |
| \$20,000 – \$39,000                                            | 0.14 (0.02 – 1.61)                                      |
| \$40,000 – \$49,000                                            | -                                                       |
| \$50,000 – \$69,000                                            | 0.71 (0.12 – 4.32)                                      |
| \$70,000+                                                      | 0.59 (0.3 – 2.75)                                       |
| <b>Work Outside the Home</b>                                   | 2.67 (0.81 – 8.77)                                      |
| <b>Practice Social Distancing Indoors</b>                      |                                                         |
| Never (ref.)                                                   | -                                                       |
| Sometimes                                                      | 4.00 (0.38 – 42.4)                                      |
| Always                                                         | 1.23 (0.12 – 12.7)                                      |
| <b>Practice Social Distancing Outdoors</b>                     |                                                         |
| Never (ref.)                                                   | -                                                       |
| Sometimes                                                      | 1.67 (0.13 – 21.2)                                      |
| Always                                                         | 0.64 (0.05 – 8.03)                                      |
| <b>Used Public Transport</b>                                   |                                                         |
| Never (ref.)                                                   | -                                                       |
| Once or twice                                                  | 35.0 (3.49 – 360.8)                                     |
| 3 – 7 times                                                    | 28.6 (3.04 – 268.8)                                     |
| More than 7 times                                              | 75.0 (3.66 – 1536.0)                                    |
| <b>Attended Gathering of &gt;10 People</b>                     |                                                         |
| Never (ref.)                                                   | -                                                       |
| Once or twice                                                  | 6.29 (0.94 – 42.0)                                      |
| 3 – 7 times                                                    | 16.5 (2.79 – 97.7)                                      |
| More than 7 times                                              | 11.0 (1.27 – 95.2)                                      |
| <b>Attended Gathering of &gt;100 People</b>                    |                                                         |
| Never (ref.)                                                   | -                                                       |
| Once or twice                                                  | 3.63 (0.64 – 20.6)                                      |
| 3 – 7 times                                                    | 10.9 (2.11 – 56.1)                                      |
| More than 7 times                                              | 36.3 (3.33 – 394.8)                                     |
| <b>Visited Place of Worship</b>                                |                                                         |
| Never (ref.)                                                   | -                                                       |
| Once or twice                                                  | 4.83 (0.33 – 70.4)                                      |
| 3 or more times**                                              | 16.9 (3.88 – 73.7)                                      |
| <b>Visited Friends or Family</b>                               |                                                         |
| Never (ref.)                                                   | -                                                       |



|                                                                               |                     |
|-------------------------------------------------------------------------------|---------------------|
| Once or twice                                                                 | 3.50 (0.62 – 19.9)  |
| 3 – 7 times                                                                   | 3.82 (0.64 – 22.7)  |
| More than 7 times                                                             | 21.0 (1.40 – 314.0) |
| <b>Went to a Grocery Store/Pharmacy</b>                                       |                     |
| Never (ref.)                                                                  | -                   |
| Once or twice                                                                 | 0.35 (0.02 – 6.57)  |
| 3 – 7 times                                                                   | 0.35 (0.02 – 6.57)  |
| More than 7 times                                                             | -                   |
| <b>Went to an Indoor Bar, Restaurant, Salon or Other Indoor Establishment</b> |                     |
| Never (ref.)                                                                  | -                   |
| Once or twice                                                                 | 1.21 (0.26 – 5.76)  |
| 3 – 7 times                                                                   | 5.95 (1.22 – 28.9)  |
| More than 7 times                                                             | 4.25 (0.45 – 40.0)  |
| <b>Went to a Beach, Pool or Other Outdoor Gathering Place</b>                 |                     |
| Never (ref.)                                                                  | -                   |
| Once or twice                                                                 | 5.71 (1.09 – 30.1)  |
| 3 – 7 times                                                                   | 9.60 (1.78 – 51.9)  |
| More than 7 times                                                             | 8.00 (0.80 – 79.7)  |
| <b>Always Wear Mask in Public Indoors</b>                                     |                     |
| Never or sometimes                                                            | -                   |
| Always                                                                        | 0.21 (0.06 – 0.76)  |
| <b>Always Wear Mask in Public Outdoors</b>                                    |                     |
| Never or sometimes                                                            | -                   |
| Always                                                                        | 0.41 (0.13 – 1.27)  |
| <b>Number of Close Contacts Indoors</b>                                       |                     |
| 0 (ref.)                                                                      | -                   |
| 1                                                                             | 7.42 (0.27 – 91.5)  |
| 2 – 5                                                                         | 5.82 (0.51 – 48.9)  |
| 6 – 10                                                                        | 1.67 (0.13 – 20.6)  |
| >10                                                                           | -                   |
| <b>Number of Close Contacts Outdoors</b>                                      |                     |
| 0 (ref.)                                                                      | -                   |
| 1                                                                             | 1.50 (0.20 – 11.5)  |
| 2 – 5                                                                         | 1.82 (0.36 – 9.27)  |
| 6 – 10                                                                        | -                   |
| >10                                                                           | -                   |

\* The small number of individuals who had the outcome limited ability to run multivariable analysis.
